# Supplementary material
Source: publisher figshare collection journal article supplement (https://future-science-group.figshare.com/ndownloader/files/31113073)
Supplement: Supplementary file 1 [file 31113073]

## Supplement

**Table S1 Number of completions of the Patient Benefit Index Allergic Rhinitis questionnaires**

|                                                                       | <i>n</i> | %    |
|-----------------------------------------------------------------------|----------|------|
| <b>Children</b>                                                       |          |      |
| PBI global score could be computed (PNQ and PBQ completed)            | 163      | 73.1 |
| PNQ not completed                                                     | 8        | 3.6  |
| PBQ not completed                                                     | 50       | 22.4 |
| Too many missings/"does not apply to me" for calculating global score | 2        | 0.9  |
| Total                                                                 | 223      | 100  |
| <b>Adolescents</b>                                                    |          |      |
| PBI global score could be computed (PNQ and PBQ completed)            | 88       | 72.1 |
| PNQ not completed                                                     | 5        | 4.1  |
| PBQ not completed                                                     | 28       | 23.0 |
| Too many missings/"does not apply to me" for calculating global score | 1        | 0.8  |
| Total                                                                 | 122      | 100  |
| <b>Adults</b>                                                         |          |      |
| PBI global score could be computed (PNQ and PBQ completed)            | 417      | 77.5 |
| PNQ not completed                                                     | 12       | 2.2  |
| PBQ not completed                                                     | 101      | 18.8 |
| Too many missings/"does not apply to me" for calculating global score | 8        | 1.5  |
| Total                                                                 | 538      | 100  |

PBI: Patient Benefit Index; PNQ: Patient Needs Questionnaire; PBQ: Patient Benefit Questionnaire.

**Table S2 Distribution of patient-relevant needs and benefits in children (aged 5–12 years), measured with the PBI-AR-K**

|                                                                                                                              |                                                                                        | Patient Needs<br>Questionnaire (PNQ)                |                                                  | Patient Benefit<br>Questionnaire (PBQ)              |                                               |
|------------------------------------------------------------------------------------------------------------------------------|----------------------------------------------------------------------------------------|-----------------------------------------------------|--------------------------------------------------|-----------------------------------------------------|-----------------------------------------------|
| As a result of therapy, how important<br>is it for you to ... (PNQ) /<br>The current treatment has helped me<br>to ... (PBQ) |                                                                                        | <i>n</i> (patients<br>without<br>missing<br>values) | Importance<br>rating:<br>quite/very <sup>1</sup> | <i>n</i> (patients<br>without<br>missing<br>values) | Benefit<br>rating:<br>quite/very <sup>2</sup> |
| 1)                                                                                                                           | ... no longer have to sneeze (S2)                                                      | 214                                                 | 61.7                                             | 167                                                 | 43.7                                          |
| 2)                                                                                                                           | ... no longer have a runny or stuffy nose (S3)                                         | 214                                                 | 84.1                                             | 168                                                 | 42.9                                          |
| 3)                                                                                                                           | ... be able to breathe through your nose freely (S3)                                   | 214                                                 | 84.1                                             | 166                                                 | 41.0                                          |
| 4)                                                                                                                           | ... feel less tired or groggy (S2)                                                     | 215                                                 | 61.9                                             | 130                                                 | 50.8                                          |
| 5)                                                                                                                           | ... be able to stay outdoors without symptoms (S4)                                     | 215                                                 | 83.7                                             | 155                                                 | 51.0                                          |
| 6)                                                                                                                           | ... have an easily applicable treatment (S1)                                           | 211                                                 | 82.0                                             | 152                                                 | 78.9                                          |
| 7)                                                                                                                           | ... not have itching eyes, nose or throat anymore (S4)                                 | 213                                                 | 86.4                                             | 165                                                 | 48.5                                          |
| 8)                                                                                                                           | ... not have burning or watery eyes anymore (S4)                                       | 214                                                 | 78.0                                             | 148                                                 | 48.0                                          |
| 9)                                                                                                                           | ... no longer have hay fever symptoms (S3)                                             | 213                                                 | 89.7                                             | 168                                                 | 45.8                                          |
| 10)                                                                                                                          | ... be able to sleep better (S2)                                                       | 215                                                 | 65.1                                             | 131                                                 | 56.5                                          |
| 11)                                                                                                                          | ... need less time for treatment (S1)                                                  | 211                                                 | 67.3                                             | 145                                                 | 79.3                                          |
| 12)                                                                                                                          | ... feel well even with having hay fever (S3)                                          | 212                                                 | 90.1                                             | 156                                                 | 60.3                                          |
| 13)                                                                                                                          | ... be able to do anything you want in your free time even while having hay fever (S4) | 215                                                 | 88.8                                             | 149                                                 | 63.8                                          |
| 14)                                                                                                                          | ... feel more comfortable being around other people (S2)                               | 215                                                 | 75.3                                             | 123                                                 | 65.9                                          |
| 15)                                                                                                                          | ... be focused at school (S2)                                                          | 214                                                 | 69.6                                             | 120                                                 | 62.5                                          |
| 16)                                                                                                                          | ... not be excluded by others (S2)                                                     | 214                                                 | 46.3                                             | 83                                                  | 55.4                                          |
| 17)                                                                                                                          | ... not to have to go to the doctor so often (S1)                                      | 215                                                 | 71.2                                             | 142                                                 | 69.0                                          |

|     |                                       |     |      |     |      |
|-----|---------------------------------------|-----|------|-----|------|
| 18) | ... have a comfortable treatment (S1) | 215 | 81.4 | 157 | 74.5 |
| 19) | ... have fewer side effects (S1)      | 214 | 79.4 | 148 | 72.3 |

PBI-AR-K: Patient Benefit Index Allergic Rhinitis for children and adolescents; PNQ: Patient Needs Questionnaire; PBQ: Patient Benefit Questionnaire; n: Number of patients.

<sup>1</sup>Percentage calculated with 100 % including patients ticking “does not apply”.

<sup>2</sup>Percentage calculated with 100 % excluding patients ticking “did not apply”, as for these patients, the goal was not important; S1 item from the subscale ‘treatment burden’, S2 item from the subscale ‘fatigue/social life’, S3 item from the subscale ‘physical symptoms’, S4 item from the subscale ‘being outdoors’.

This is not an official translation of the PBI-AR-K.

**Table S3 Distribution of patient-relevant needs and benefits in adolescents (aged 13–17 years), measured with the PBI-AR-K**

| As a result of therapy, how important is it for you to ... (PNQ) /<br>The current treatment has helped me to ... (PBQ) | Patient Needs<br>Questionnaire (PNQ)       |                                            | Patient Benefit<br>Questionnaire (PBQ)     |                                         |
|------------------------------------------------------------------------------------------------------------------------|--------------------------------------------|--------------------------------------------|--------------------------------------------|-----------------------------------------|
|                                                                                                                        | <i>n</i> (patients without missing values) | Importance rating: quite/very <sup>1</sup> | <i>n</i> (patients without missing values) | Benefit rating: quite/very <sup>2</sup> |
| 1) ... no longer have to sneeze (S2)                                                                                   | 116                                        | 57.8                                       | 90                                         | 45.6                                    |
| 2) ... no longer have a runny or stuffy nose (S2)                                                                      | 117                                        | 69.2                                       | 92                                         | 51.1                                    |
| 3) ... be able to breathe through your nose freely (S2)                                                                | 115                                        | 77.4                                       | 91                                         | 54.9                                    |
| 4) ... feel less tired or groggy (S3)                                                                                  | 115                                        | 60.0                                       | 75                                         | 49.3                                    |
| 5) ... be able to stay outdoors without symptoms (S2)                                                                  | 115                                        | 75.7                                       | 86                                         | 51.2                                    |
| 6) ... have an easily applicable treatment (S1)                                                                        | 113                                        | 71.7                                       | 82                                         | 69.5                                    |
| 7) ... not have itching eyes, nose or throat anymore (S2)                                                              | 117                                        | 76.1                                       | 86                                         | 52.3                                    |
| 8) ... not have burning or watery eyes anymore (S2)                                                                    | 117                                        | 76.1                                       | 88                                         | 54.5                                    |
| 9) ... no longer have hay fever symptoms (S2)                                                                          | 117                                        | 86.3                                       | 91                                         | 48.4                                    |
| 10) ... be able to sleep better (S3)                                                                                   | 117                                        | 55.6                                       | 73                                         | 63.0                                    |
| 11) ... need less time for treatment (S1)                                                                              | 117                                        | 61.5                                       | 80                                         | 75.0                                    |
| 12) ... feel well even with having hay fever (S3)                                                                      | 116                                        | 77.6                                       | 81                                         | 70.4                                    |
| 13) ... be able to do anything you want in your free time even while having hay fever (S3)                             | 117                                        | 83.8                                       | 77                                         | 62.3                                    |
| 14) ... feel more comfortable being around other people (S3)                                                           | 117                                        | 62.4                                       | 69                                         | 63.8                                    |
| 15) ... be focused at school (S3)                                                                                      | 116                                        | 62.9                                       | 70                                         | 54.3                                    |
| 16) ... not be excluded by others (S3)                                                                                 | 115                                        | 32.2                                       | 47                                         | 61.7                                    |
| 17) ... not to have to go to the doctor so often (S1)                                                                  | 115                                        | 60.9                                       | 75                                         | 68.0                                    |

|     |                                       |     |      |    |      |
|-----|---------------------------------------|-----|------|----|------|
| 18) | ... have a comfortable treatment (S1) | 117 | 73.5 | 85 | 68.2 |
| 19) | ... have fewer side effects (S1)      | 116 | 76.7 | 81 | 65.4 |

PBI-AR-K: Patient Benefit Index Allergic Rhinitis for children and adolescents; PNQ: Patient Needs Questionnaire; PBQ: Patient Benefit Questionnaire; n: Number of patients.

<sup>1</sup>Percentage calculated with 100 % including patients ticking “does not apply”.

<sup>2</sup>Percentage calculated with 100 % excluding patients ticking “did not apply”, as for these patients, the goal was not important; S1 item from the subscale ‘treatment burden’, S2 item from the subscale ‘physical symptoms’, S3 item from the subscale ‘psychological burden’.

This is not an official translation of the PBI-AR-K.

**Table S4 Distribution of patient-relevant needs and benefits in adults ( $\geq 18$  years), measured with the PBI-AR**

| As a result of therapy, how important is it for you to ... (PNQ) /<br>The current treatment has helped me to ... (PBQ) | Patient Needs<br>Questionnaire (PNQ)       |                                            | Patient Benefit<br>Questionnaire (PBQ)     |                                         |
|------------------------------------------------------------------------------------------------------------------------|--------------------------------------------|--------------------------------------------|--------------------------------------------|-----------------------------------------|
|                                                                                                                        | <i>n</i> (patients without missing values) | Importance rating: quite/very <sup>1</sup> | <i>n</i> (patients without missing values) | Benefit rating: quite/very <sup>2</sup> |
| 1) ... not have sneezing impulses anymore (S3)                                                                         | 524                                        | 80.2                                       | 424                                        | 49.8                                    |
| 2) ... no longer have a runny or stuffed up nose (S3)                                                                  | 524                                        | 90.8                                       | 426                                        | 49.5                                    |
| 3) ... be able to breathe through your nose more freely (S3)                                                           | 525                                        | 89.0                                       | 423                                        | 53.0                                    |
| 4) ... feel less fatigued or groggy (S4)                                                                               | 523                                        | 76.9                                       | 409                                        | 48.2                                    |
| 5) ... be able to stay outdoors without symptoms (S3)                                                                  | 524                                        | 88.9                                       | 425                                        | 50.8                                    |
| 6) ... feel less irritated (S1)                                                                                        | 523                                        | 58.5                                       | 357                                        | 48.5                                    |
| 7) ... have an easily applicable treatment (S2)                                                                        | 522                                        | 80.1                                       | 423                                        | 71.6                                    |
| 8) ... not have itching on the eyes, nose or palate anymore (S3)                                                       | 525                                        | 85.0                                       | 422                                        | 55.0                                    |
| 9) ... not have burning or watery eyes anymore (S3)                                                                    | 523                                        | 81.6                                       | 410                                        | 53.4                                    |
| 10) ... be healed of all symptoms (S3)                                                                                 | 523                                        | 88.7                                       | 425                                        | 42.1                                    |
| 11) ... be able to sleep better (S1)                                                                                   | 525                                        | 70.9                                       | 395                                        | 50.1                                    |
| 12) ... feel less depressed (S1)                                                                                       | 525                                        | 61.0                                       | 352                                        | 50.0                                    |
| 13) ... experience a greater enjoyment of life (S1)                                                                    | 525                                        | 66.1                                       | 360                                        | 53.6                                    |
| 14) ... have no fear that the disease will become worse (S1)                                                           | 523                                        | 62.1                                       | 370                                        | 55.9                                    |
| 15) ... be more productive in everyday life (S4)                                                                       | 525                                        | 78.1                                       | 402                                        | 55.5                                    |
| 16) ... be able to engage in normal leisure activities (S4)                                                            | 526                                        | 78.1                                       | 417                                        | 57.8                                    |
| 17) ... be comfortable showing yourself more in public (S1)                                                            | 523                                        | 46.7                                       | 317                                        | 49.8                                    |

|     |                                                        |     |      |     |      |
|-----|--------------------------------------------------------|-----|------|-----|------|
| 18) | ... be able to concentrate better at work (S4)         | 522 | 71.3 | 379 | 54.6 |
| 19) | ... be less burdened in your partnership (S1)          | 523 | 46.5 | 311 | 52.7 |
| 20) | ... be able to have a normal sex life (S1)             | 523 | 42.8 | 288 | 48.6 |
| 21) | ... be less dependent on doctor and clinic visits (S2) | 521 | 62.0 | 363 | 52.1 |
| 22) | ... need less time for daily treatment (S2)            | 520 | 67.1 | 400 | 58.5 |
| 23) | ... have fewer out-of-pocket treatment expenses (S2)   | 523 | 64.2 | 400 | 52.8 |
| 24) | ... have fewer side effects (S2)                       | 524 | 73.3 | 402 | 57.2 |
| 25) | ... have confidence in the therapy (S2)                | 522 | 81.6 | 417 | 67.1 |

---

PBI-AR: Patient Benefit Index Allergic Rhinitis; PNQ: Patient Needs Questionnaire; PBQ: Patient Benefit Questionnaire; n: Number of patients.

<sup>1</sup>Percentage calculated with 100 % including patients ticking “does not apply”.

<sup>2</sup>Percentage calculated with 100 % excluding patients ticking “did not apply”, as for these patients, the goal was not important; S1 item from the subscale ‘psychological burden’, S2 item from the subscale ‘treatment burden’, S3 item from the subscale ‘physical symptoms’, S4 item from the subscale ‘activity/physical capability’.
